# Supplementary material
Source: publisher figshare collection journal article supplement (https://future-science-group.figshare.com/ndownloader/files/31485422)
Supplement: Supplementary file 1 [file 31485422]

**Supplementary Table 1**: Significant changes of HOXC family members mRNA expression between GC and normal gastric tissues (ONCOMINE)

|  | Types of GC vs. Gastric | Fold change | P value | Reference |
| --- | --- | --- | --- | --- |
| HOXC6 | Diffuse Gastric Adenocarcinoma vs. Normal | 3.091 | 1.23E-9 | Cho Gastric[36] |
|  | Gastric Intestinal Type Adenocarcinoma vs. Normal | 3.432 | 2.14E-6 | Cho Gastric[36] |
|  | Gastric Mixed Adenocarcinoma vs. Normal | 2.113 | 0.002 | Cho Gastric[36] |
|  | Gastric Intestinal Type Adenocarcinoma vs. Normal | 6.590 | 6.75E-11 | DErrico Gastric[37] |
|  | Gastric Mixed Adenocarcinoma vs. Normal | 5.824 | 0.004 | DErrico Gastric[37] |
| HOXC8 | Diffuse Gastric Adenocarcinoma vs. Normal | 1.694 | 1.81E-9 | Cho Gastric[36] |
|  | Gastric Intestinal Type Adenocarcinoma vs. Normal | 2.159 | 2.19E-5 | Cho Gastric[36] |
|  | Gastric Mixed Adenocarcinoma vs. Normal | 1.513 | 0.008 | Cho Gastric[36] |
| HOXC9 | Diffuse Gastric Adenocarcinoma vs. Normal | 1.819 | 2.72E-8 | Cho Gastric[36] |
|  | Gastric Intestinal Type Adenocarcinoma vs. Normal | 2.393 | 4.66E-6 | Cho Gastric[36] |
|  | Gastric Adenocarcinoma vs. Normal | 2.174 | 0.006 | Cho Gastric[36] |
|  | Gastric Mixed Adenocarcinoma vs. Normal | 3.839 | 4.71E-7 | DErrico Gastric[37] |
|  | Diffuse Gastric Adenocarcinoma vs. Normal | 2.966 | 1.23E-4 | DErrico Gastric[37] |
|  | Gastric Intestinal Type Adenocarcinoma vs. Normal | 2.602 | 3.89E-4 | DErrico Gastric[37] |
| HOXC10 | Gastric Cancer vs. Normal | 4.671 | 0.003 | Wang Gastric[38] |
|  | Gastric Intestinal Type Adenocarcinoma vs. Normal | 3.768 | 1.85E-6 | DErrico Gastric[37] |
| HOXC11 | Gastric Cancer vs. Normal | 2.053 | 0.006 | Cui Gastric[39] |
|  | Gastric Intestinal Type Adenocarcinoma vs. Normal | 1.715 | 5.47E-5 | DErrico Gastric[37] |
| HOXC13 | Gastric Cancer vs. Normal | 4.846 | 0.003 | Cui Gastric[39] |
